# Supplementary material for: Mental Health Service Utilization by Iraq and Afghanistan Veterans After Entry Into PTSD Specialty Treatment
Source: Atypon-hosted journal article supplement (doi:10.1176/appi.ps.201300117), 2014-06-02
Supplement: 1066_ds001.pdf [file 1066_ds001.pdf]

Table 1. Sample characteristics (N=594)

| Characteristic                                                                     | Overall (N=594) |      | New Patients (n=172) |      | Continuing Patients (n=422) |      | P     |
|------------------------------------------------------------------------------------|-----------------|------|----------------------|------|-----------------------------|------|-------|
|                                                                                    | N               | %    | N                    | %    | N                           | %    |       |
| Gender                                                                             |                 |      |                      |      |                             |      | .568  |
| Male                                                                               | 524             | 88.2 | 155                  | 90.1 | 369                         | 87.4 |       |
| Female                                                                             | 69              | 11.6 | 17                   | 9.9  | 52                          | 12.3 |       |
| Missing                                                                            | 1               | .2   | 0                    | .0   | 1                           | .2   |       |
| Age (M±SD years)                                                                   | 33.92±9.15      |      | 32.85±8.94           |      | 34.36±9.21                  |      | .070  |
| Marital Status                                                                     |                 |      |                      |      |                             |      | .604  |
| Married                                                                            | 255             | 42.9 | 71                   | 41.3 | 184                         | 43.6 |       |
| Not Married                                                                        | 339             | 57.1 | 101                  | 58.7 | 238                         | 56.4 |       |
| Race                                                                               |                 |      |                      |      |                             |      | .001  |
| Black                                                                              | 213             | 35.9 | 72                   | 41.9 | 141                         | 33.4 |       |
| Non-Black                                                                          | 288             | 48.5 | 64                   | 37.2 | 224                         | 53.1 |       |
| Missing                                                                            | 93              | 15.7 | 36                   | 20.9 | 57                          | 13.5 |       |
| Service Connected Disability Rating                                                |                 |      |                      |      |                             |      | .089  |
| ≥50 percent                                                                        | 266             | 44.8 | 67                   | 39.0 | 199                         | 47.2 |       |
| <50 percent                                                                        | 325             | 54.7 | 105                  | 61.1 | 220                         | 52.1 |       |
| Missing                                                                            | 3               | .5   | 0                    | .0   | 3                           | .7   |       |
| Diagnosis                                                                          |                 |      |                      |      |                             |      |       |
| Psychotic Disorders <sup>2</sup>                                                   | 29              | 4.9  | 1                    | .6   | 28                          | 6.6  | .002  |
| Depression                                                                         | 197             | 33.2 | 33                   | 19.2 | 164                         | 38.9 | <.001 |
| Other Anxiety                                                                      | 60              | 10.1 | 11                   | 6.4  | 49                          | 11.6 | .056  |
| Substance Use Disorder                                                             | 99              | 16.7 | 15                   | 8.7  | 84                          | 19.9 | <.001 |
| Mild Traumatic Brain Injury                                                        | 40              | 6.7  | 11                   | 6.4  | 29                          | 6.9  | .834  |
| Number of Co-Occurring Diagnoses                                                   |                 |      |                      |      |                             |      | <.001 |
| 0                                                                                  | 326             | 54.9 | 118                  | 68.6 | 208                         | 49.3 |       |
| 1                                                                                  | 175             | 31.3 | 48                   | 34.5 | 127                         | 30.2 |       |
| 2                                                                                  | 71              | 12.7 | 6                    | 4.3  | 65                          | 15.5 |       |
| 3+                                                                                 | 22              | 3.9  | 0                    | .0   | 22                          | 5.2  |       |
| # of years between military discharge and PTSD program entry (mean±SD)             | 3.47±1.62       |      | 3.24±1.60            |      | 3.57±1.62                   |      | .026  |
| # of years between 1 <sup>st</sup> PTSD diagnosis and PTSD program entry (mean±SD) | .92±1.29        |      | .32±.80              |      | 1.17±1.37                   |      | <.001 |

<sup>1</sup> Two-tailed t-tests for age, years between military discharge and PTSD program entry, and years between 1<sup>st</sup> PTSD diagnosis and PTSD program entry; chi-squared tests for all other factors

<sup>2</sup> Psychotic disorder diagnoses included schizophrenia, schizoaffective disorder, bipolar disorder, and other psychotic conditions (see text).

Table 2. New and continuing patients' mental health service use in the 180 days following entry into a PTSD specialty program (N=594)

| Service Category                               | New Patients (n=172) |      | Continuing Patients (n=422) |      | X <sup>2</sup> | p     |
|------------------------------------------------|----------------------|------|-----------------------------|------|----------------|-------|
|                                                | Mean                 | SD   | Mean                        | SD   |                |       |
| Outpatient mental health (visits)              | 8.7                  | 12.0 | 13.3                        | 16.1 | 16.95          | <.001 |
| PTSD specialty clinical programs               | 5.2                  | 9.5  | 8.3                         | 14.3 | 9.66           | .002  |
| Other mental health programs                   | 3.9                  | 6.4  | 5.8                         | 8.1  | 14.77          | <.001 |
| Outpatient substance use treatment (visits)    | 1.7                  | 9.3  | 2.3                         | 11.4 | .36            | .546  |
| Inpatient mental health (bed days)             | .5                   | 4.0  | 1.3                         | 9.3  | 1.54           | .214  |
| Residential mental health treatment (bed days) | 4.0                  | 19.0 | 14.9                        | 37.6 | 5.87           | .015  |
| Psychotropic medication possession (days)      | 34.9                 | 47.0 | 75.6                        | 60.5 | 24.24          | <.001 |
| Antidepressants                                | 31.0                 | 45.0 | 62.9                        | 57.9 | 15.40          | <.001 |
| Antipsychotics                                 | 2.9                  | 14.0 | 20.4                        | 41.0 | 20.83          | <.001 |
| Hypnotics                                      | 3.5                  | 12.4 | 16.1                        | 33.8 | 14.92          | <.001 |
| Mood stabilizers                               | 4.7                  | 18.7 | 15.7                        | 37.3 | 6.28           | .012  |
| Anti-adrenergic agents                         | 4.9                  | 17.7 | 15.6                        | 36.7 | 6.00           | .014  |
